# Supplementary material for: Botulinum Toxin as Targeted Neuromodulation in Complex Regional Pain Syndrome: An Anatomy-Informed Mechanistic Review
Source: MDPI journal article supplement (doi:10.3390/toxins18040160), 2026-03-27
Supplement: s1 [file toxins-4186906-supplementary.pdf › toxins-4186906-supplementary.pdf]

# Supplementary Materials: Botulinum Toxin as Targeted Neuromodulation in Complex Regional Pain Syndrome: An Anatomy-Informed Mechanistic Review

Areerat Suputtitada <sup>1,2</sup>

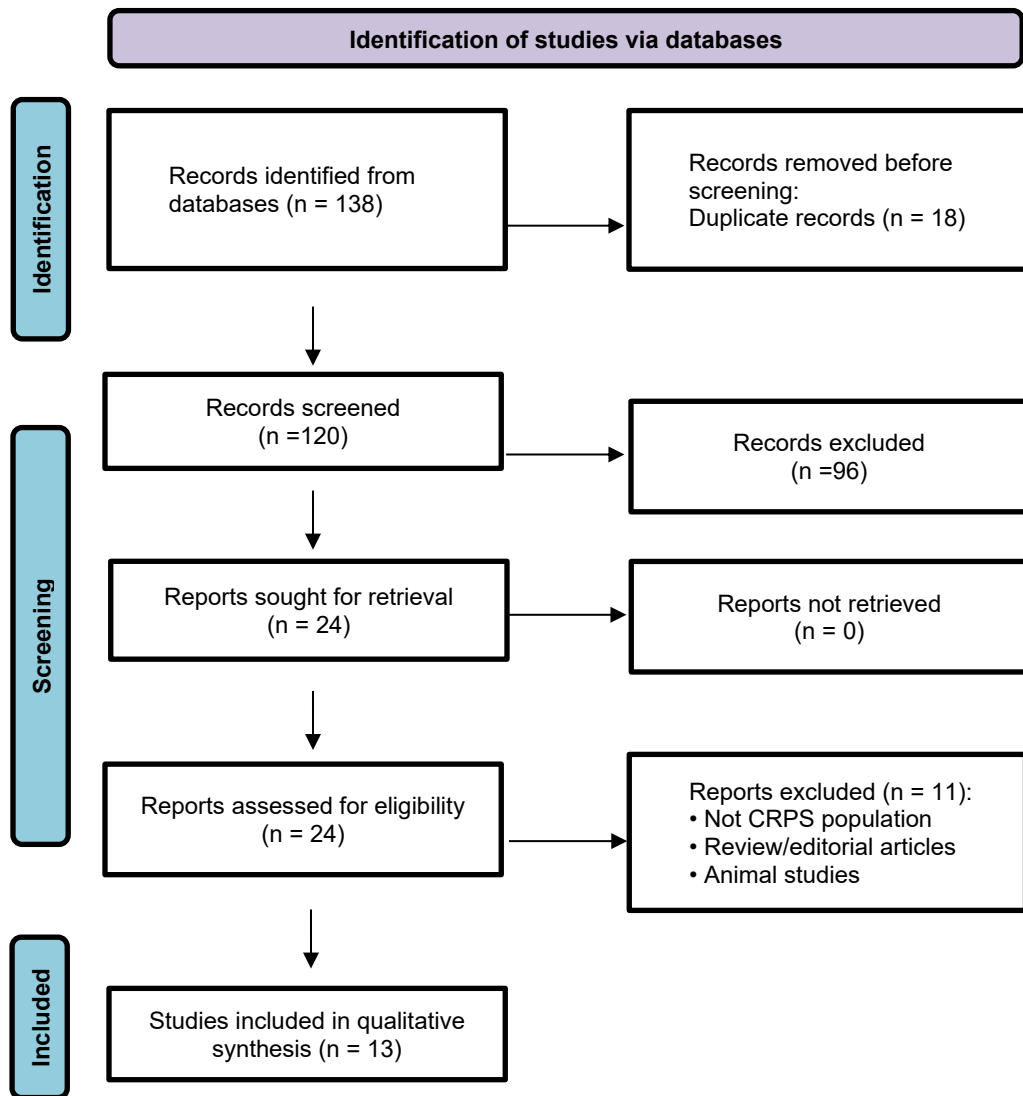

**Figure S1.** PRISMA 2020 flow diagram illustrating study identification, screening, eligibility assessment, and inclusion of studies evaluating botulinum toxin interventions in complex regional pain syndrome.

**Table S1.** Risk of Bias 2 (ROB 2) assessment for randomised controlled trials

| Study                 | Randomisation | Deviations    | Missing data | Outcome measurement | Selective reporting | Overall risk  |
|-----------------------|---------------|---------------|--------------|---------------------|---------------------|---------------|
| Carroll et al [16].   | Some concerns | Low           | Low          | Some concerns       | Low                 | Some concerns |
| Yoo et al [17].       | Low           | Low           | Low          | Low                 | Low                 | Low           |
| Lee et al [18].       | Some concerns | Some concerns | Low          | Some concerns       | Some concerns       | Some concerns |
| Safarpour et al [26]. | Low           | Low           | Low          | Some concerns       | Some concerns       | Some concerns |

Risk of bias was assessed using the Cochrane Risk of Bias 2 tool across five domains: randomisation process, deviations from intended interventions, missing outcome data, measurement of outcomes, and selection of the reported result. Overall risk reflects the highest level of concern across domains.

**Table S2.** ROBINS-I assessment for non-randomised interventional studies

| Study                     | Confounding | Selection | Classification | Deviations | Missing data | Outcome measurement | Reporting | Overall risk |
|---------------------------|-------------|-----------|----------------|------------|--------------|---------------------|-----------|--------------|
| Moon et al [19].          | Serious     | Moderate  | Low            | Moderate   | Low          | Moderate            | Moderate  | Serious      |
| Meyer-Frießem et al [20]. | Serious     | Moderate  | Low            | Moderate   | Low          | Moderate            | Moderate  | Serious      |
| Fallatah [21].            | Serious     | Serious   | Low            | Low        | Low          | Moderate            | Serious   | Serious      |
| Tereshko et al [27].      | Serious     | Moderate  | Low            | Low        | Low          | Moderate            | Moderate  | Serious      |

Risk of bias was assessed using the ROBINS-I tool across seven domains. Overall risk reflects the highest level of bias identified and indicates methodological certainty rather than magnitude of clinical effect.

**Table S3.** Newcastle–Ottawa Scale (NOS) for observational studies

| Study                | Selection | Comparability | Outcome | Total    |
|----------------------|-----------|---------------|---------|----------|
| Cordivari et al [22] | ★★☆☆      | ☆☆            | ★★☆     | ★★★★☆☆☆☆ |
| Kharkar et al [23]   | ★★★★      | ☆☆            | ★★☆     | ★★★★☆☆☆☆ |
| Schilder et al [24]  | ★★☆☆      | ☆☆            | ★★☆     | ★★★★☆☆☆☆ |
| Lessard et al [25]   | ★★★★      | ☆☆            | ★★☆     | ★★★★☆☆☆☆ |
| Bellon et al [28]    | ★★☆☆      | ☆☆            | ★★☆     | ★★★★☆☆☆☆ |

NOS quality classification:

- Very good quality: 9–10 stars
- Good quality: 7–8 stars
- Satisfactory quality: 5–6 stars
- Unsatisfactory quality: 0–4 stars

Studies were assessed across selection, comparability, and outcome domains using the Newcastle Ottawa Scale. Stars indicate methodological quality, with a maximum of nine stars. No study received comparability stars due to absence of control groups, limiting causal inference and increasing susceptibility to confounding.

**Table S4.** GRADE certainty of evidence summary

| Outcome                                                               | Key studies (refs)                                                                | Study design                                                                                  | Risk of bias           | Inconsistency          | Indirectness                   | Imprecision | Publication bias | Overall certainty |
|-----------------------------------------------------------------------|-----------------------------------------------------------------------------------|-----------------------------------------------------------------------------------------------|------------------------|------------------------|--------------------------------|-------------|------------------|-------------------|
| Pain reduction with sympathetic ganglion targeting                    | Carroll et al [16]; Yoo et al [17]; Lee et al [18].                               | Randomised controlled trials                                                                  | Not serious            | Not serious            | Not serious                    | Serious     | Undetected       | Moderate          |
| Pain reduction with plexus or perineural targeting                    | Moon et al [19]; Meyer-Frießem et al [20]; Fallatah [21].                         | Observational studies (case series and uncontrolled studies)                                  | Serious                | Serious                | Not serious                    | Serious     | Suspected        | Low               |
| Motor improvement in motor-dominant CRPS with intramuscular injection | Cordivari et al [22]; Kharkar et al [23]; Schilder et al [24].                    | Observational studies (case series and uncontrolled experimental study)                       | Serious                | Serious                | Serious (indirectness present) | Serious     | Suspected        | Low               |
| Analgesic effect of superficial or peripheral tissue delivery         | Lessard et al [25]; Safarpour et al [26]; Tereshko et al [27]; Bellon et al [28]. | Randomized controlled trial and observational studies (cohort, case series, and case reports) | Not serious to serious | Not serious to serious | Not serious to serious         | Serious     | Suspected        | Low to very low   |

Certainty of evidence was assessed using the Grading of Recommendations Assessment Development and Evaluation framework. Outcomes were downgraded for risk of bias, inconsistency, indirectness, imprecision, and suspected publication bias. Certainty ratings reflect confidence in the estimated effect rather than the magnitude or clinical importance of the effect.

**Table S5.** Database Search Strategies Used for Literature Identification

| Database                | Search Strategy                                                                                                                                                                                                                                                                                                                                                                                                        |
|-------------------------|------------------------------------------------------------------------------------------------------------------------------------------------------------------------------------------------------------------------------------------------------------------------------------------------------------------------------------------------------------------------------------------------------------------------|
| <b>PubMed / MEDLINE</b> | ("complex regional pain syndrome"[Title/Abstract] OR CRPS[Title/Abstract]) AND ("botulinum toxin"[Title/Abstract] OR "botulinum toxin type A"[Title/Abstract] OR "botulinum toxin type B"[Title/Abstract]) AND (sympathetic[Title/Abstract] OR "sympathetic block"[Title/Abstract] OR "brachial plexus"[Title/Abstract] OR perineural[Title/Abstract] OR intramuscular[Title/Abstract] OR intradermal[Title/Abstract]) |
| <b>Embase</b>           | ('complex regional pain syndrome' OR CRPS) AND ('botulinum toxin' OR 'botulinum toxin type A' OR 'botulinum toxin type B') AND (sympathetic OR 'sympathetic block' OR 'brachial plexus' OR perineural OR intramuscular OR intradermal)                                                                                                                                                                                 |
| <b>Scopus</b>           | TITLE-ABS-KEY ("complex regional pain syndrome" OR CRPS) AND TITLE-ABS-KEY ("botulinum toxin" OR "botulinum toxin type A" OR "botulinum toxin type B") AND TITLE-ABS-KEY (sympathetic OR "sympathetic block" OR "brachial plexus" OR perineural OR intramuscular OR intradermal)                                                                                                                                       |
